# Supplementary material for: Interaction of lecithin:cholesterol acyltransferase with lipid surfaces and apolipoprotein A-I-derived peptides
Source: PubMed Central journal article supplement (PMC5880497; doi:10.1194/jlr.m082685), 2018-02-08
Supplement: 10.1194_M082685_jlr.M082685-1.pdf [file 10.1194_M082685_jlr.M082685-1.pdf]

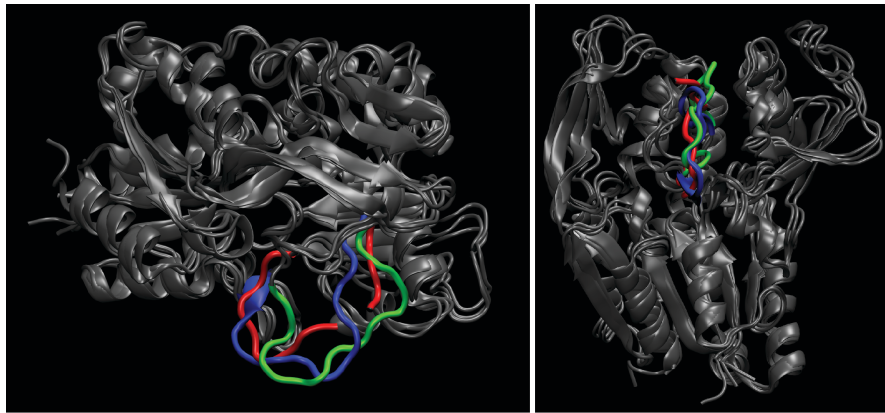

Figure S1 The superimposed structures of LCAT showing the conformation of the lid-region in the X-ray structure of 5TXF (red), before (blue) and after (green) LCAT-water-closed-AA simulation, respectively.
