# Supplementary material for: Interaction of lecithin:cholesterol acyltransferase with lipid surfaces and apolipoprotein A-I-derived peptides
Source: PubMed Central journal article supplement (PMC5880497; doi:10.1194/jlr.m082685), 2018-02-08
Supplement: 10.1194_M082685_jlr.M082685-3.pdf [file 10.1194_M082685_jlr.M082685-3.pdf]

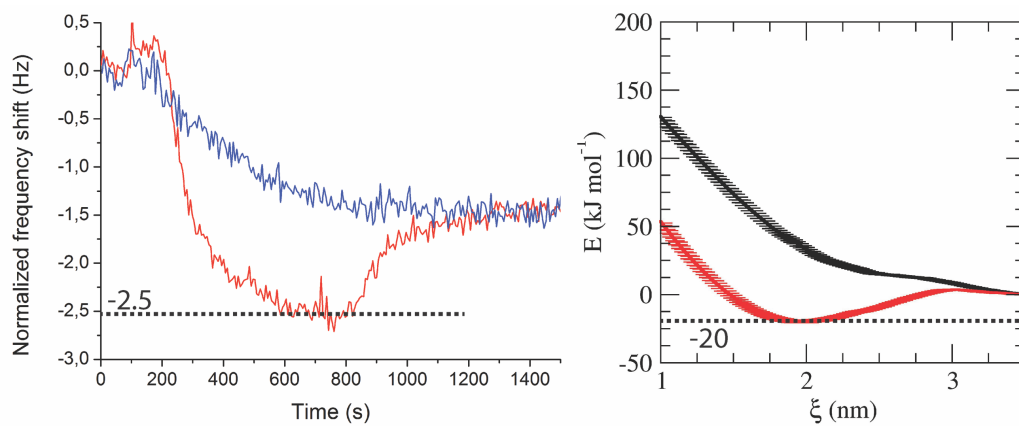

Figure S3 Left: QCM result for the peptide 135-155 (Left). Blue and red curves indicate the pure LCAT and combined LCAT+peptide measurements, respectively. The minimum response is marked with the black dashed line. Right: Potential mean force profiles for the peptide 135-155 with the coil (black) and  $\alpha$ -helical secondary structure (red).
