# Supplementary material for: Interaction of lecithin:cholesterol acyltransferase with lipid surfaces and apolipoprotein A-I-derived peptides
Source: PubMed Central journal article supplement (PMC5880497; doi:10.1194/jlr.m082685), 2018-02-08
Supplement: 10.1194_M082685_jlr.M082685-9.pdf [file 10.1194_M082685_jlr.M082685-9.pdf]

## Supplementary movies

**Movie S1** LCAT-mem-open-AA simulation showing the burial of non-polar amino acids (white spheres) in lipids in the lid-open state. The domains of LCAT are colored according to Figure 1. In addition, the lid region is colored with blue. The green spheres represent the phosphate groups of DOPC molecules.

**Movie S2** LCAT-mem-open-CG showing the burial of non-polar amino acids (white spheres) in lipids in the lid-open state. The domains of LCAT are colored according to Figure 1. The greenish spheres represent the phosphate groups of DOPC molecules.

**Movie S3** LCAT-mem-closed-AA simulation showing the burial of non-polar amino acids (white spheres) in lipids in the lid-closed state. The domains of LCAT are colored according to Figure 1. In addition, the lid region is colored with blue. The green spheres represent the phosphate groups of DOPC molecules.

**Movie S4** LCAT-mem-closed-CG simulation showing the burial of non-polar amino acids (white spheres) in lipids in the lid-closed state. The domains of LCAT are colored according to Figure 1. The greenish spheres represent the phosphate groups of DOPC molecules.

**Movie S5** LCAT-mem-acyl-AA simulation showing the entry of cholesterol (orange spheres) to the active site of LCAT (red sticks). The green spheres represent the phosphate groups of DOPC molecules. The oleate chain linked to SER181 is shown as cyan spheres.

**Movie S6** LCAT-mem-open-AA simulation showing the exchange of cholesterol (blue and violet spheres) molecules in the active site of LCAT (red sticks). The green spheres represent the phosphate groups of DOPC molecules. The oleate chain linked to SER181 is shown as cyan spheres.
